# Supplementary material for: Duplication and Diversification of REPLUMLESS – A Case Study in the Papaveraceae
Source: Front Plant Sci. 2018 Dec 12;9:1833. doi: 10.3389/fpls.2018.01833 (PMC6299025; doi:10.3389/fpls.2018.01833)
Supplement: TABLE S1 — List of the genes included in the phylogenetic analysis, with corresponding species, family and accession number of the sequences. [file Table_1.XLSX]

## Sheet: Sheet1
Gene	Species	Family	Accession number	Data base
	Core Eudictos
AcneRPL	Acer negundo L.	Aceraceae	VFFP-2012237	OneKP
AscuRPL	Asclepias curassavica L.	Apocynaceae	DSUV-2010692	OneKP
BamaRPL	Batis maritima L.	Bataceae	DZTK-2007039	OneKP
ArlyRPL	Arabidopsis lyrata (L.) O'Kane & Al-Shehbaz	Brassicaceae	486980	Phytozome
AtRPL	Arabidopsis thaliana Schur	Brassicaceae	At5g0230	NCBI
AralRPL	Arabis alpina L.	Brassicaceae	TZWR-2044377	Phytozome
BrraRPL	Brassica rapa L.	Brassicaceae	Bra009618	Phytozome
BrraRPL2	Brassica rapa L.	Brassicaceae	Bra028883	Phytozome
CaruRPL	Capsella rubella Reut.	Brassicaceae	Carubv10000448m	Phytozome
ThhaRPL	Thellungiella halophila O.E.Schulz	Brassicaceae	Thhalv10012876	Phytozome
SialRPL	Sinapis alba L.	Brassicaceae	WMNH-2000089	OneKP
ClviRPL	Cleome violacea L.	Capparidaceae	LVUS-2010603	OneKP
CapaRPL	Carica papaya L.	Caricaceae	Evm.TU.supercontig 56.56	Phytozome
CaglRPL	Casuarina glauca Spreng.	Casuarinaceae	LNER-2006332	OneKP
IpinRPL	Ipomoea indica Merr.	Colvolvulaceae	OQBM-2015458	OneKP
CupeRPL	Cuscuta pentagona Engelm.	Convolvulaceae	AHRN-2012810	OneKP
CusaRPL	Cucumis sativus L.	Cucurbitaceae	Cucsa.175830.1	Phytozome
DiinRPL	Dillenia indica L.	Dileniaceae	EHNF-2021421	OneKP
MaesRPL	Manihot esculenta Crantz	Euphorbiaceae	Cassava4.1-003548m.g.	Phytozome
RicoRPL	Ricinus communis L.	Euphorbiaceae	29973.m000390	OneKP
GlmaRPL	Glycine max (L.) Merr.	Fabaceae	Glyma03g17397.1	Phytozome
GlmaRPL2	Glycine max (L.) Merr.	Fabaceae	Glyma01g25710.2	Phytozome
GlmaRPL3	Glycine max (L.) Merr.	Fabaceae	Glyma18g41280.1	Phytozome
MetrRPL	Medicago truncatula Gaertn.	Fabaceae	Medtr7g065050.1	Phytozome
PospRPL	Pogostemon sp.	Lamiaceae	GETL-2015293	OneKP
ScmoRPL	Scutellaria montana Chapm.	Lamiaceae	ATYL-2001588	OneKP
MeofRPL	Melissa officinalis L.	Lamiaceae	TAGM-2049017	OneKP
ThvuRPL	Thymus vulgaris L.	Lamiaceae	IYDF-2009612	OneKP
LipeRPL	Linum perenne L.	Linaceae	XWMS-2004890	OneKP
GoraRPL	Gossypium raimondii Ulbr.	Malvaceae	Gorai.012G108300.1	Phytozome
GoraRPL	Gossypium raimondii Ulbr.	Malvaceae	Gorai.012G108300.2	Phytozome
MoolRPL	Moringa oleifera L.	Moringaceae	CZPV-2048449	OneKP
EugrRPL	Eucalyptus grandis W. Hill	Myrtaceae	Eucgr.K03046	Phytozome
OrfaRPL	Orobanche fasciculata Nutt.	Orobanchaceae	VYDM-2014609	OneKP
PacaRPL	Passiflora caerulea L.	Passifloraceae	SIZE-2017166	OneKP
MadoRPL	Malus domestica Borkh.	Rosaceae	MDP0000126587	Phytozome
MadoRPL2	Malus domestica Borkh.	Rosaceae	MDP0000429775	Phytozome
MadoRPL3	Malus domestica Borkh.	Rosaceae	MDP0000209399	Phytozome
PrpeRPL	Prunus persica (L.) Batsch	Rosaceae	Ppa.002604m.g.	Phytozome
SaspRPL	Salvadora sp.	Salvadoraceae	RTTY-2018926	OneKP
MiguRPL	Mimulus guttatus DC.	Scrophulariaceae	Mgu.1a002791m.g	Phytozome
SoduRPL1	Solanum dulcamara L.	Solanaceae	GHLP_scaffold_2006410	OneKP
SoduRPL2	Solanum dulcamara L.	Solanaceae	GHLP_scaffold_2059273	OneKP
SolyRPL	Solanum lycopersicum L.	Solanaceae	Solyc10g086640.1	Phytozome
SolyRPL2	Solanum lycopersicum L.	Solanaceae	Solyc09g011380.2	Phytozome
SoptRPL1	Solanum ptychanthum Dunal	Solanaceae	DLJZ_scaffold_2053145	OneKP
SoptRPL2	Solanum ptychanthum Dunal	Solanaceae	DLJZ_scaffold_2001908	OneKP
SotuRPL	Solanum tuberosum L.	Solanaceae	PGSC0003DMG400019142	Phytozome
SotuRPL2	Solanum tuberosum L.	Solanaceae	PGSC003DMG400049235	Phytozome
ThcaRPL	Theobroma cacao L.	Sterculiaceae	Thecc1EG021834	Phytozome
ThcaRPL2	Theobroma cacao L.	Sterculiaceae	Thecc1EG021834t2	Phytozome
TrpeRPL	Tropaeolum peregrinum L.	Tropaeolaceae	MYZV-2059470	OneKP
VaofRPL	Valeriana officinalis L.	Valerianaceae	FFFY-2005096	OneKP
ViviRPL	Vitis vinifera L.	Vitaceae	GSVIVG01034073001	Phytozome
CiquRPL	Cissus quadrangularis L.	Vitaceae	BGZG-2013848	OneKP
	Basal Eudicots
NadoRPL	Nadina domestica Thunb.	Berberidaceae	MAGPIE:ndo_NDORT1PF_Trinity--comp4747_c0_seq1	Phytometasyn
NadoRPL	Nandina domestica Thunb.	Berberidaceae	MAGPIE:ndo_NDORT1PF_Trinity--comp4747_c0_seq1	Phytometasyn
NadoRPL2	Nandina domestica Thunb.	Berberidaceae	MAGPIE:ndo_NDORT1PF_Trinity--comp45964_c0_seq1	Phytometasyn
EupleRPL	Euptelea pleiosperma Hook.f. & Thomson	Eupteleaceae	QTJY_scaffold_2000804	OneKP
CimuRPL	Cissampelos mucronata A. Rich.	Menispermaceae	MAGPIE:cmu_CMUCC1PF_Trinity--comp4530_c0_seq1	Phytometasyn
CimuRPL2	Cissampelos mucronata A. Rich.	Menispermaceae	MAGPIE:cmu_CMUCC1PF_Trinity--comp4530_c0_seq2	Phytometasyn
CimuRPL3	Cissampelos mucronata A. Rich.	Menispermaceae	MAGPIE:cmu_CMUCC1PF_Trinity--comp5748_c2_seq1	Phytometasyn
MecaRPL	Menispermum canadense L.	Menispermaceae	MAGPIE:Mec_MCARH1PF_Trinity--comp47721_c0_seq1	Phytometasyn
MecaRPL	Menispermum canadense L.	Menispermaceae	MAGPIE:Mec_MCARH1PF_Trinity--comp47721_c0_seq1	Phytometasyn
MecaRPL2	Menispermum canadense L.	Menispermaceae	MAGPIE:Mec_MCARH1PF_Trinity--comp6292_c1_seq8	Phytometasyn
TicoRPL	Tinospora cordifolia (Willd.) Miers ex Hook. f. & Thomson	Menispermaceae	MAGPIE:tco_TCOCC1PF_Trinity--comp1058_c1_seq1	Phytometasyn
BofrRPL1	Bocconia frutescens L.	Papaveraceae
BofrRPL2	Bocconia frutescens L.	Papaveraceae
BofrRPL3	Bocconia frutescens L.	Papaveraceae
ChmaRPL	Chelidonium majus L.	Papaveraceae	MAGPIE:chm_CMAST2PF_Velvet--Singlet14029	Phytometasyn
ChmaRPL2	Chelidonium majus L.	Papaveraceae	MAGPIE:chm_CMART2PF_Velvet--Contig5467	Phytometasyn
GlflRPL1	Glaucium flavum Crantz	Papaveraceae	MAGPIE:gfl_GFLRT2PF_Trinity--comp35032_c2_seq1	Phytometasyn
GlflRPL2	Glaucium flavum Crantz	Papaveraceae	MAGPIE:gfl_GFLRT2PF_Trinity--comp33167_c2_seq2	Phytometasyn
PabrRPL	Papaver bracteatum Lindl.	Papaveraceae	MAGPIE:pbr_PBRST1PF_Velvet--Contig37964	Phytometasyn
StdiRPL1	Stylophorum diphyllum (Michx.) Nutt.	Papaveraceae	MAGPIE:sdi_SDIST1PF_Trinity--comp10317_c0_seq1	Phytometasyn
StdiRPL2	Stylophorum diphyllum (Michx.) Nutt.	Papaveraceae	MAGPIE:sdi_SDIST1PF_Trinity--comp20149_c0_seq1	Phytometasyn
CeveRPL	Ceratocapnos vesicaria	Papaveraceae - Fumarioideae	UDHA_scaffold_2004677	OneKP
CaseRPL	Capnoides sempervirens Borkh.	Papaveraceae- Fumarioideae	AUGV_scaffold_2001864	OneKP
ArmeRPL	Argemone mexicana L.	Papaveraceae- Papaveroideae	MAGPIE:ame_AMEST1PF_Trinity--comp5113_c0_seq2	Phytometasyn
ChmaRPL1	Chelidonium majus L.	Papaveraceae- Papaveroideae	MAGPIE:chm_CMAST2PF_Velvet--Singlet9874	Phytometasyn
ChmaRPL2	Chelidonium majus L.	Papaveraceae- Papaveroideae	MAGPIE:chm_CMAST2PF_Velvet--Singlet14029	Phytometasyn
PabrRPL	Papaver bracteatum Lindl.	Papaveraceae- Papaveroideae	MAGPIE:pbr_PBRST1PF_Velvet--Contig37964	Phytometasyn
PabrRPL2	Papaver bracteatum Lindl.	Papaveraceae- Papaveroideae	MAGPIE:pbr_PBRST1PF_Velvet--Singlet7150	Phytometasyn
PsomRPL	Papaver somniferum L.	Papaveraceae- Papaveroideae	KKCW-2001151	OneKP
SacaRPL	Sanguinaria canadensis L.	Papaveraceae- Papaveroideae	XHKT-2009137	OneKP
HycaRPL	Hydrastis canadensis L.	Ranunculaceae	MAGPIE:hca_HCARH2PF_Mira--HCARH2PF_c5832	Phytometasyn
HycaRPL2	Hydrastis canadensis L.	Ranunculaceae	MAGPIE:hca_HCARH2PF_Mira--HCARH2PF_rep_c22540	Phytometasyn
NisaRPL	Nigella sativa L.	Ranunculaceae	MAGPIE:nsa_NSART1PF_Trinity--comp7543_c0_seq1	Phytometasyn
NisaRPL2	Nigella sativa L.	Ranunculaceae	MAGPIE:nsa_NSART1PF_Trinity--comp11713_c0_seq2	Phytometasyn
NisaRPL3	Nigella sativa L.	Ranunculaceae	MAGPIE:nsa_NSART1PF_Trinity--comp2081_c0_seq1	Phytometasyn
NisaRPL4	Nigella sativa L.	Ranunculaceae	MAGPIE:nsa_NSART1PF_Trinity--comp5803_c0_seq1	Phytometasyn
ThflRPL	Thalictrum flavum L.	Ranunculaceae	MAGPIE:tfl_TFLRT1PF_Trinity--comp2750_c0_seq1	Phytometasyn
XasiRPL	Xanthorhiza simplicissima Marshall	Ranunculaceae	MAGPIE:xsi_XSIRH1PF_Trinity--comp257596_c0_seq1	Phytometasyn
XasiRPL2	Xanthorhiza simplicissima Marshall	Ranunculaceae	MAGPIE:xsi_XSIRT1PF_Trinity--comp745_c0_seq5	Phytometasyn
XasiRPL3	Xanthorhiza simplicissima Marshall	Ranunculaceae	MAGPIE:xsi_XSIRH1PF_Trinity--comp286714_c1_seq1	Phytometasyn
AqcoRPL	Aquilegia coerulea	Ranunculaceae	Aqcoe5G183	Phytozome
AqcoRPL2	Aquilegia coerulea	Ranunculaceae	Aqcoe2G233	Phytozome
	Monocots
qSH1	Oryza sativa L.	Poaceae	LOC-Os01g62920	Phytozome
OrsaRPL2	Oryza sativa L.	Poaceae	LOC-Os05g38120	Phytozome
ZemaRPL	Zea mays L.	Poaceae	GRMZM2G074645-T01	Phytozome
ZemaRPL2	Zea mays L.	Poaceae	GRMZM2G125976-T01	Phytozome
ZemaRPL3	Zea mays L.	Poaceae	GRMZM2G154641-T01	Phytozome
MapaRPL	Mapania palustris (Hassk. ex Steud.) F.-Vill.	Cyperaceae	XPAF-2057465	OneKP
OrmaRPL	Orchidantha maxillarioides (Ridl.) K. Schum.	Lowiaceae	LSKK-2011206	OneKP
PoauRPL	Posidonia australis Hook. f.	Posidoniaceae	BYQM-2012756	OneKP
	Basal Angiosperms
MimaRPL	Michelia maudiae T.P. Yi & J.C. Fan	Magnoliaceae	XQWC-2021315	OneKP
MyfraRPL	Myristica fragrans Houtt.	Myristicaceae	OBPL-2006262	OneKP
AsruRPL	Ascarina rubricaulis Solms	Chloranthaceae	WZFE-2018769	OneKP
ArriRPL	Aristolochia ringens Vahl	Aristolochiaceae	TRINITY_DN11499_c0_g1_i3	OneKP
ArriRPL2	Aristolochia ringens Vahl	Aristolochiaceae	TRINITY_DN11499_c0_g1_i4	OneKP
ArriRPL3	Aristolochia ringens Vahl	Aristolochiaceae	TRINITY_DN11499_c0_g1_i6	OneKP
ArfiRPL	Aristolochia fimbriata Cham.	Aristolochiaceae	c14709_g1_i1
AfiRPL2	Aristolochia fimbriata Cham.	Aristolochiaceae	c14709_g3_i1
	Outgroup
AlyrPNF	Arabidopsis lyrata (L.) O'Kane & Al-Shehbaz	Brassicaceae	481709	NCBI
ATPNF	Arabidopsis thaliana Schur	Brassicaceae	At5g0230	NCBI
CaruPNF	Capsella rubella Reut.	Brassicaceae	Carubv10024860m	NCBI
